# Supplementary material for: The Impact of Inflammatory Stimuli on Xylosyltransferase-I Regulation in Primary Human Dermal Fibroblasts
Source: MDPI journal article supplement (doi:10.3390/biomedicines10061451), 2022-06-19
Supplement: s1 [file s1]

## Supplementary Material

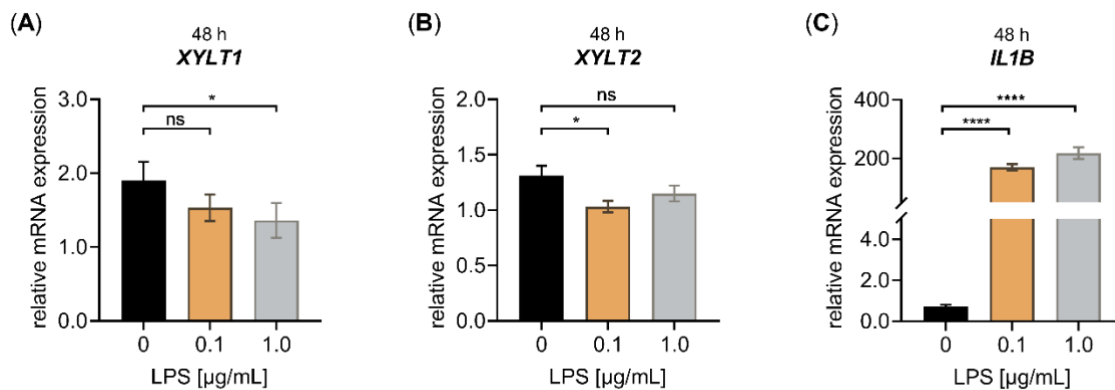

**Figure S1.** The effect of LPS on the relative *XYLT1*, *XYLT2* and *IL1B* mRNA expression of primary fibroblasts cultured in low-density culture conditions for 48 h. The NHDF ( $n = 3$ ) were cultured at a cell density of 50 cells/mm<sup>2</sup> in growth medium supplemented with 10 % (*v/v*) FCS the day before the experiment. Treatment was performed with either 0 µg/mL LPS (black), 0.1 µg/mL LPS (orange) or 1.0 µg/mL LPS (grey) supplemented growth medium. The relative (A) *XYLT1*, (B) *XYLT2* and (C) *IL1B* mRNA-expression was analyzed after LPS treatment of NHDF for 48 h by qRT-PCR. All data are means  $\pm$  SEM of three biological and three technical replicates per donor-derived primary cell culture. Mann-Whitney *U* test: ns (not significant), \*  $p < 0.05$  and \*\*\*\*  $p < 0.0001$ .

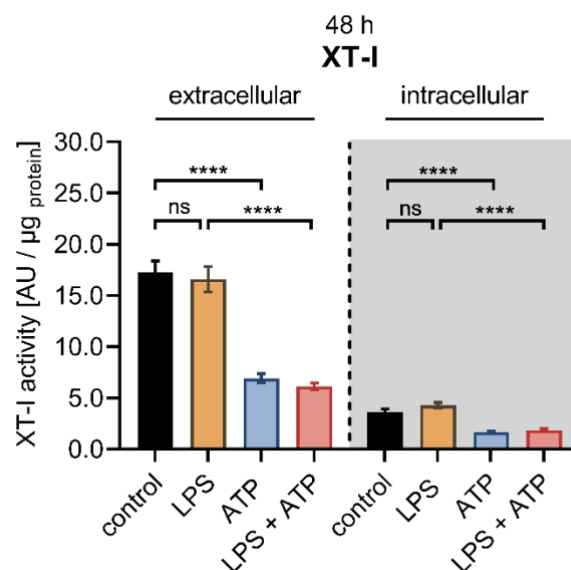

**Figure S2.** The cellular XT-I activity of primary fibroblasts after LPS and ATP treatment for 48 h. The NHDF ( $n = 3$ ) were cultured at a cell density of 177 cells/mm<sup>2</sup> in growth medium supplemented with 10 % (*v/v*) FCS the day before the experiment. Cells were treated with either 0.1 µg/mL LPS (orange), 5 mM ATP (blue) or both 0.1 µg/mL LPS and 5 mM ATP (red) for 48 h. The cellular XT-I activity was determined in the cell culture supernatant (extracellular) and the corresponding cell lysates (intracellular, grey-shaded) by UPLC-ESI-MS/MS XT-I assay. The XT-I activity is expressed in AU per µg of protein. All data are means  $\pm$  SEM of three biological and three technical replicates per donor-derived primary cell culture. Mann-Whitney *U* test: ns (not significant) and \*\*\*\*  $p < 0.0001$ .

**Table S1.** The sequences, annealing temperatures ( $T_A$ ) and expected product sizes of the oligonucleotides used for qRT-PCR analysis.

| <b>gene</b>  | <b>5' to 3' primer sequences</b>                    | <b><math>T_A</math> / °C</b> | <b>product size / bp</b> |
|--------------|-----------------------------------------------------|------------------------------|--------------------------|
| <i>CASP1</i> | CAGATGCCCACCACTGAAAGA<br>GATCTCTTCACTTCCTGCCCAC     | 63                           | 109                      |
| <i>CTSB</i>  | CCACAGTGTCACCATCAA<br>TAGCCACCATTACAGCCGTC          | 63                           | 191                      |
| <i>IL1B</i>  | ACAGATGAAGTGCTCCTTCCA<br>GTCGGAGATTCGTAGCTGGAT      | 63                           | 73                       |
| <i>IL8</i>   | GAACTGAGAGTGATTGAGAGTGGA<br>CTCTTCAAAAATTCTCCACAACC | 63                           | 134                      |
